# Supplementary material
Source: Springer Nature journal article supplement (https://www.springermedizin.de/resource/supplementary/13023_2008_153_MOESM1_ESM.pdf/9641746)
Supplement: MOESM1 [file 9641746]

Glycine + Succinyl CoA

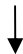

Aminolevulinic Acid

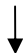

Porphobilinogen

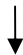

Hydroxymethylbilane

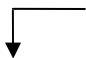

Uroporphyrinogen Isomer III

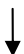

7- COOH – porphyrin  
6- COOH – porphyrin  
5- COOH – porphyrin

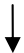

Coproporphyrinogen III

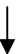

Harderoporphyrogen

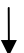

Protoporphyrinogen

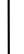

Protoporphyrin IX  
accumulated metabolite in  
**EPP**

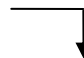

Uroporphyrinogen Isomer I

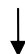

Coproporphyrinogen I

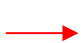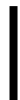

HAEM
